# Supplementary material for: Sleep duration and the risk of cancer: a systematic review and meta-analysis including dose–response relationship
Source: Springer Nature journal article supplement (doi:10.1186/s12885-018-5025-y), 2018-11-21

Meta-analysis estimates, given named study is omitted

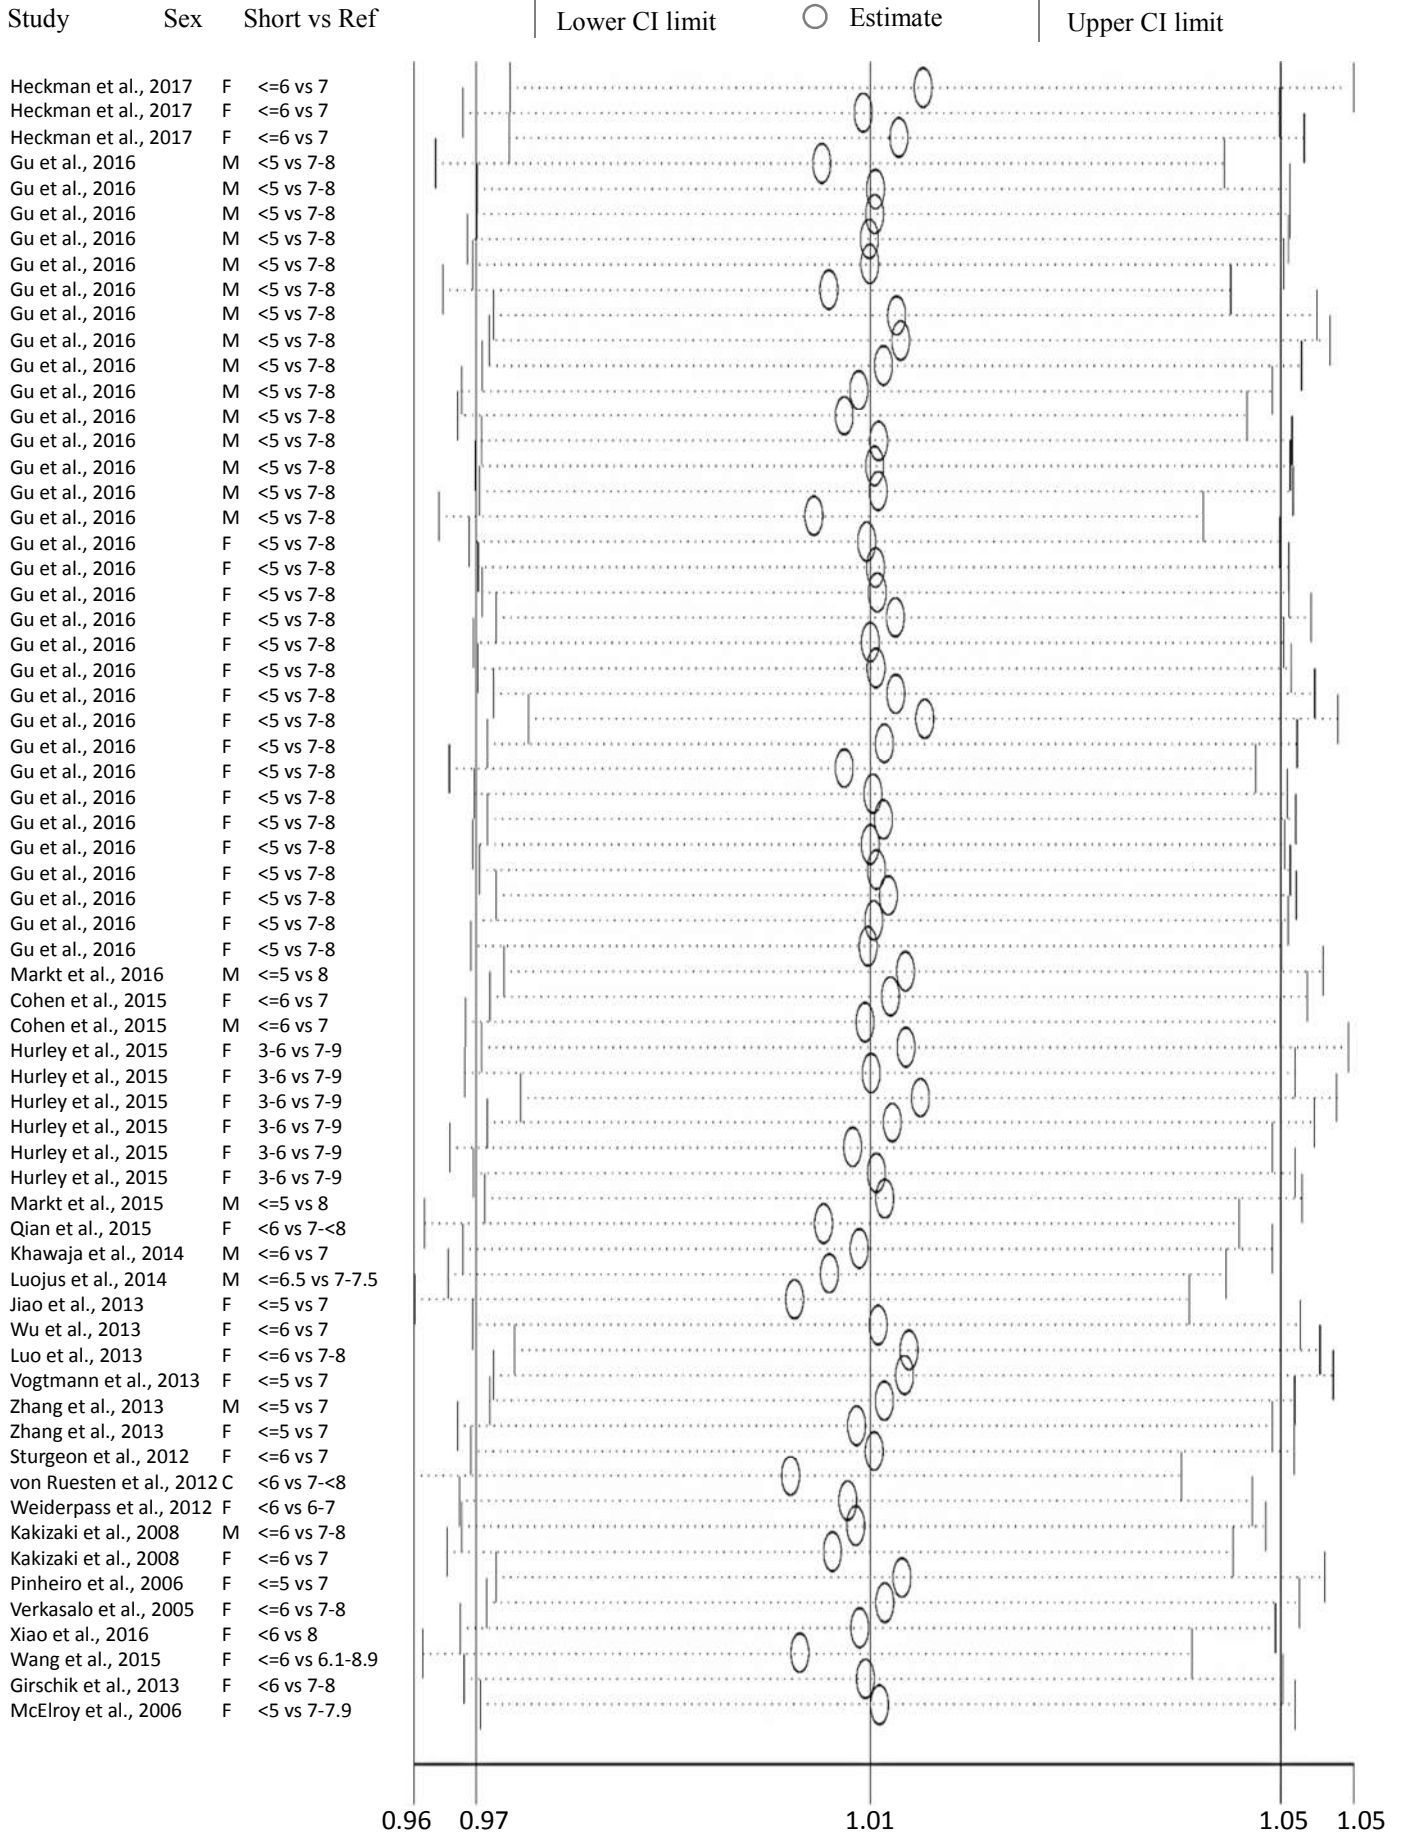

Supplement: MOESM5 [file 16286524]
